# Supplementary material
Source: Springer Nature journal article supplement (https://www.springermedizin.de/resource/supplementary/12943_2014_1365_MOESM6_ESM.pdf/9552816)

A

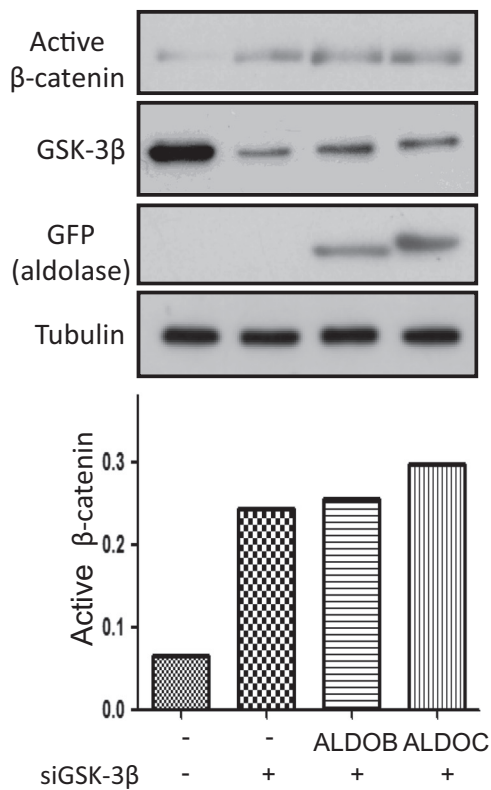

B

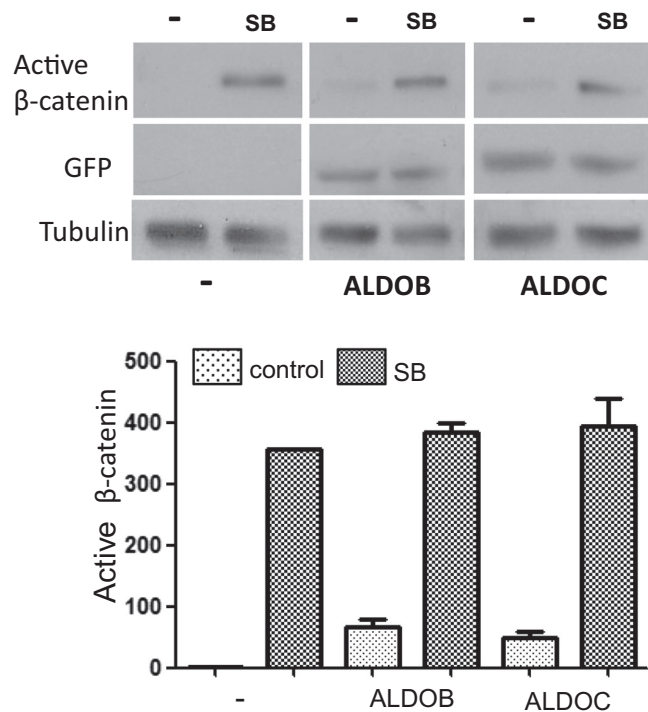

C

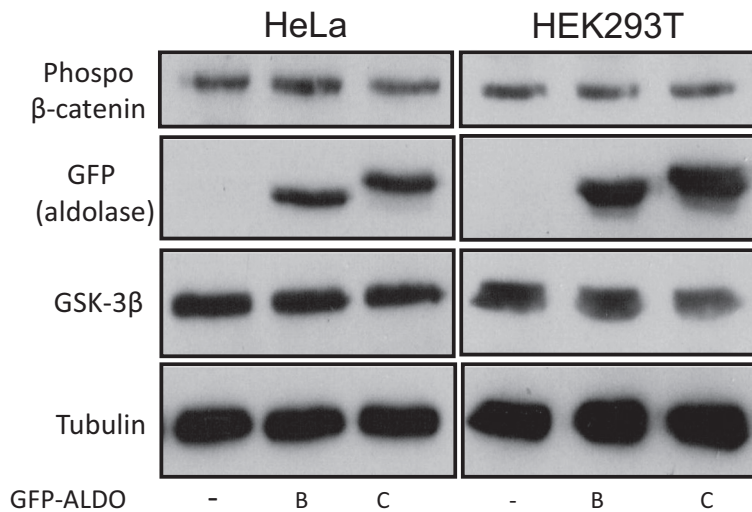

Supplement: MOESM6 [file 9552816]
